# Supplementary material
Source: PubMed Central journal article supplement (PMC3677465)
Supplement: 1304056110_pnas.201304056SI.pdf [file 1304056110_pnas.201304056SI.pdf]

# Supporting Information

Hattori et al. 10.1073/pnas.1304056110

## SI Materials and Methods

**Plasmid Construction.** The cDNA sequence of *Avena sativa* Phototropin1 was synthesized from oligonucleotides by PCR. An N-terminal fragment of firefly luciferase and McLuc1 cDNAs were amplified by PCR with sources of cDNA constructs (1). Human microtubule-associated protein1 light chain 3 (LC3)-A cDNA was amplified from cDNA clone vector (Kazusa original ORF clone, ORH5916). PCR products were inserted into a mammalian expression vector, pcDNA/V5-His (B) (Invitrogen) and were sequenced using a genetic analyzer (AB310; Applied Biosystems). A replication-deficient adenoviral vector encoding the fusion protein photo-inactivatable luciferase (PI-Luc) was constructed with the cosmid vector pAxCawtit2 (TaKaRa).

**Selection of a Stable Cell Line.** For establishing respective cell lines that stably expressed a series of PI-Luc, HEK293 cells were subcultured in DMEM (Wako) supplemented with 10% FBS (Gibco), 100 units/mL penicillin and 100 µg/mL streptomycin (Gibco) at 37 °C in an incubator with 5% CO<sub>2</sub>. The plasmids were transfected into HEK293 cells with a Lipofectamine 2000 reagent (Invitrogen). Stable expressing cells were obtained after ~7 d of selection in 1.0 mg/mL Zeocin (Invitrogen) containing the growth medium. A single clone expressing PI-Luc was cultured into the subpopulation for additional experiments.

**Sample Preparation.** All experimental buffers for living cell measurement except for pH calibration were based on HBSS (Gibco) supplemented with 10% FBS, 10 mM Hepes, and 2 mM D-luciferin (potassium salt; Wako). Staurosporine (Sigma) was provided directly into the buffer. The subcultured cell line was exchanged to the experimental buffer immediately before experiments. When the half-recovery time (RT) values were calibrated for pH, the stable cells were dipped into a phosphate-based pH-adjusting

buffer supplemented with 10% (vol/vol) FBS, 2 mM D-luciferin, 1 µM 5-(and-6)-carboxy seminaphthorhodafluor-1-acetoxymethyl ester (SNARF-1-AM), and 20 µM nigericin (sodium salt; Sigma) as a proton ionophore. The pH condition of the buffer was adjusted to 37 °C before experiments.

**Immunostaining.** Cell lines cultured on a cover glass with or without serum starvation were incubated for 2 h. Cells were washed with PBS and were fixed with 3.7% formaldehyde at 37 °C for 15 min. The cells were washed and permeabilized with 0.2% Triton X-100 in PBS for 5 min with subsequent washing three times with PBS. The cells were blocked by 0.2% fish skin gelatin (FSG) in PBS overnight at 4 °C. The buffer was exchanged to PBS (0.2% FSG) containing 1/2,000 dilution of rabbit anti-firefly luciferase antibody (Abcam) and mouse Anti-LAMP2 antibody (Abcam), and incubated for 1 h at room temperature, shaking gently. After washing with PBS, the cells were filled with PBS (0.2% FSG) containing 1/2,000 dilution of a goat anti-rabbit IgG labeled with Cy3 (Molecular Probes, Inc.) and a donkey anti-mouse IgG labeled with AlexaFluoro 488 (Molecular Probes, Inc.) and incubated for 1 h at room temperature. Cells were washed with PBS (0.2% FSG) and fixed on a cover glass with Mowiol. The samples were observed under a confocal fluorescence microscope (FV-1000; Olympus).

**Preparation and Infection of Adenovirus.** The cosmid vector pAxCawtit2 including the cDNA of PI-Luc was transfected into HEK293 cells. After 7–14 d of culture, high-titer adenoviruses were collected and purified by ultracentrifugation with a cesium chloride density gradient. The titer was  $3.6 \times 10^9$  pfu/mL, evaluated with Adeno-X Rapid Titer kit (Clontech). The adenoviruses were infected to a mouse footpad by s.c. injection 3 d before experiments ( $1 \times 10^6$  pfu/footpad).

1. Hida N, et al. (2009) High-sensitivity real-time imaging of dual protein-protein interactions in living subjects using multicolor luciferases. *PLoS ONE* 4(6):e5868.

LOV2 region (404-546 a.a.) in *Avena sativa* Phototropin1 (1-923 a.a.)

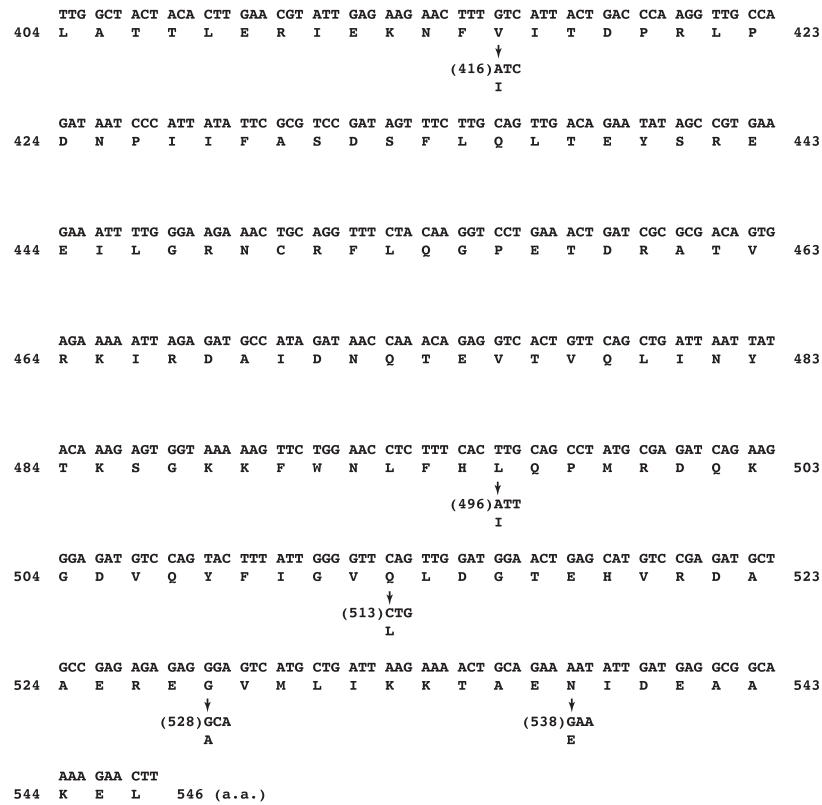

**Fig. S1.** Mutated amino acids in a light, oxygen, and voltage domain from *Avena sativa* Phototropin1 (LOV2). DNA and amino acid sequences of LOV2 protein region in *A. sativa* Phototropin1 are shown. Substituted amino acid residues and their corresponding DNA sequences are indicated with arrows (Q513L, V416I&L496I, and G528E&N538E). Numbers are positions of the amino acid sequence in Phototropin1.

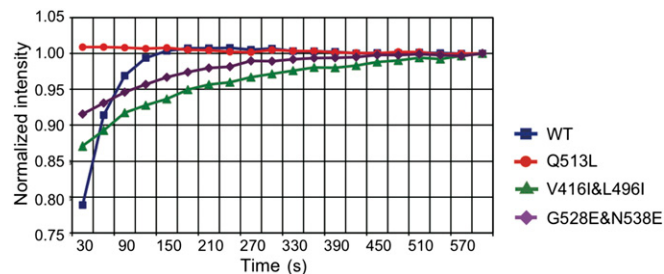

**Fig. S2.** Time-course measurements of bioluminescence for LOV2 domain mutants. Bioluminescence intensities of PI-Luc expressed in HEK293 cells were measured after blue light irradiation. The bioluminescence intensities were normalized against initial values of bioluminescence intensities. Data are shown for 10 min.



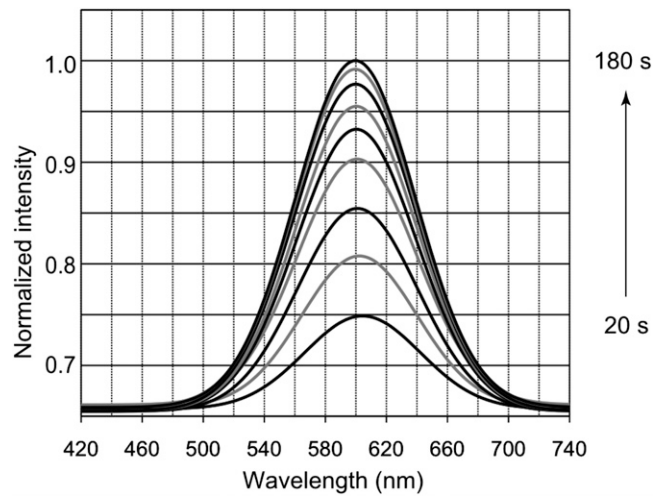

**Fig. S5.** Time-dependent bioluminescence spectra of PI-Luc after light stimulation. Bioluminescence spectra were obtained using cell lysates that include PI-Luc. Bioluminescence was measured every 20 s after blue light irradiation. The sequential spectra are displayed alternately in black and gray.



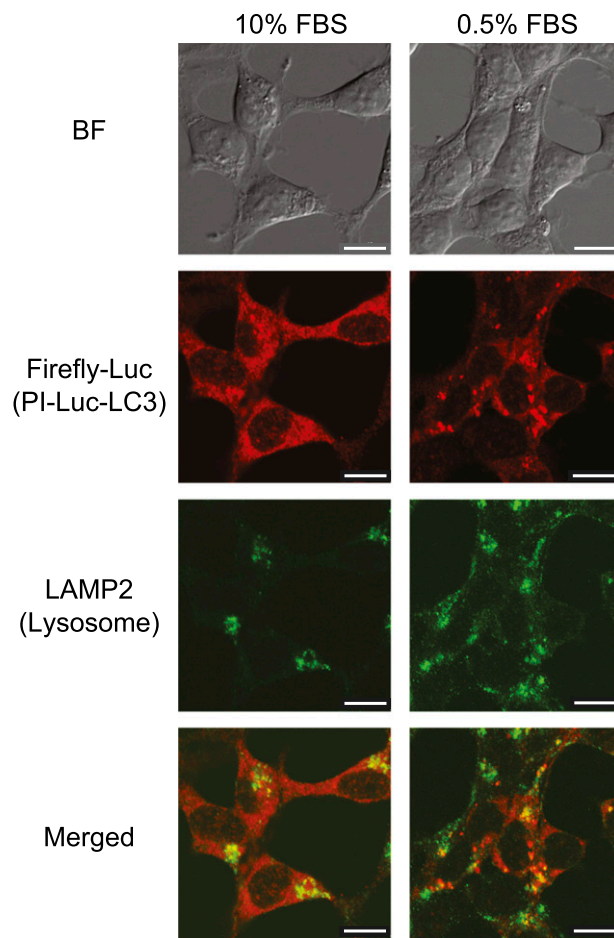

**Fig. S7.** Intracellular localization of PI-Luc-LC3 under serum starvation. HEK293 cells containing PI-Luc-LC3 were cultured under serum starvation (0.5%) for 2 h. Localization of PI-Luc-LC3 was detected by immunostaining with a rabbit anti-firefly luciferase antibody. Lysosomes were detected with mouse anti-LAMP2 antibody. (Scale bar, 10  $\mu$ m.)



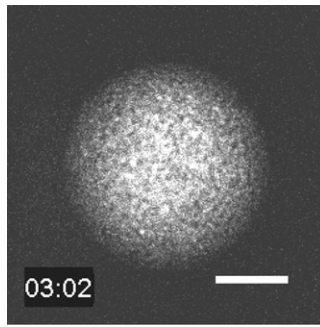

**Movie S1.** Time-lapse bioluminescence recovery of cell population with light irradiation. A PI-Luc–expressed cell population in a cultured dish was set on a microscope and irradiated with blue light. Each bioluminescence image was taken in sequence using a bioluminescence microscope for 10-s exposure. The displayed count shows the elapsed time from the start of measurement. (Scale bar, 1 mm.)

[Movie S1](#)

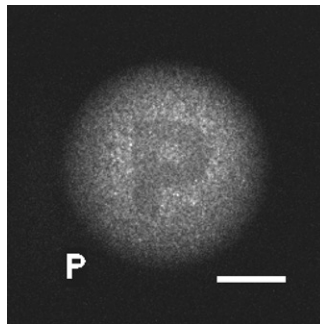

**Movie S2.** Time-lapse bioluminescence recovery of the cell population with letter-shaped irradiation. A PI-Luc–expressed cell population in a cultured dish was irradiated with light having the following letter shapes: P, l, -, L, U, C. In each letter, the time-lapse recovery video was composed of five images, for 30 images in all. Each image was taken sequentially using a bioluminescence microscope for 10-s exposure. The interval time between individual letters was 20 s. (Scale bar, 1 mm.)

[Movie S2](#)
